# Supplementary material for: Molecular Cloning, Expression Pattern and Genotypic Effects on Glucoraphanin Biosynthetic Related Genes in Chinese Kale (Brassica oleracea var. alboglabra Bailey)
Source: PubMed Central journal article supplement (PMC6332273; doi:10.3390/molecules201119688), 2015-11-11
Supplement: molecules-20-19688-s001.pdf [file molecules-20-19688-s001.pdf]

# Supplementary Materials: Molecular Cloning, Expression Pattern and Genotypic Effects on Glucoraphanin Biosynthetic Related Genes in Chinese Kale (*Brassica oleracea* var. *alboglabra* Bailey)

Ling Yin, Changming Chen, Guoju Chen, Bihao Cao and Jianjun Lei

Table S1. PCR primers used for the study.

| Primers    | Primer Sequences (5'-3') | Description                  |
|------------|--------------------------|------------------------------|
| BCAT4-F1   | TAGGATTCGGGTTTTGTCGT     | Sequence cloning, forward    |
| BCAT4-R1   | AGAGCGTTTTGGTCTGGTCG     | Sequence cloning, reverse    |
| MAM1-F1    | GACCGTACAATAAGCAGCCTGC   | Sequence cloning, forward    |
| MAM1-R1    | TAAATCCCTGAACCGTGAGAAG   | Sequence cloning, reverse    |
| CYP79F1-F1 | ATGATCCTTACCACATCGTTAC   | Sequence cloning, forward    |
| CYP79F1-F2 | GTGGGTCTTGATAGTATTCGGC   | Sequence cloning, reverse    |
| BCAT4-F2   | GGTCGAGGATAAGAAGGGGTG    | Expression analysis, forward |
| BCAT4-R2   | TCCAAAGGGCCAAAGGAGTAG    | Expression analysis, reverse |
| MAM1-F2    | ATAGTTGGAGCCAGCTGTTTT    | Expression analysis, forward |
| MAM1-R2    | GCATCCGTGATTCTCTTTTIA    | Expression analysis, reverse |
| CYP79F1-F2 | CATGGAATGGACACTTGCGGA    | Expression analysis, forward |
| CYP79F1-R2 | TGAATGTGGCTACCTTTGGGA    | Expression analysis, reverse |
| Actin-F    | TTGTTGGTAGGCCAAGACAT     | Expression analysis, forward |
| Actin-R    | GGAGCTCGTTGTAGAAAGTG     | Expression analysis, reverse |

(a)

1 CCTTTTGCTCCTTCCTTGTCCTTGTCCAAAATGGTTTTGCCCGCCAATGTTGGCTTCGGCGAGGGTTTCTTACA  
1 M W L R R G F L T  
70 CAAAAGCAACTCGACTATCAAAAACAGGAAATCCATGGCTCCTTCTGCGGATCTCTTCTACAAGTGT  
10 Q K Q L D Y Q N R K S M A P S A R S L P T S V  
139 TCGGATGAGAAATACGCGAATGTGAAGTGGGAAGAATTAGGATTCGGGTTTTGTCTACCGACAACATG  
33 S D E K Y A N V K W E E L G F G F C R T D N M  
208 TATGTTGCCAAGTGCAAACATGGAGAGAGTTTCCAAGAGGGGAAAAATCGTTCCCTATGCTGATATCCAA  
56 Y V A K C K H G E S F Q E G K I V P Y A D I Q  
277 ATCAGCCCTTGCTCTGCAGTTCTTAACATATGGCCAGGGCTTATATGAAGGGCTTAAGGCGTACAGGACA  
79 I S P C S A V L N Y G Q G L Y E G L K A Y R T  
346 GAAGATGGCCGATTGTGCTATTCGACCAGACCAAAAACGCTCTCCGCCTTCAATCGGGTGCCAACAGA  
102 E D G R I V L F R P D Q N A L R L Q S G A N R  
415 CTTGTATGCCTTATCCCACGGTCGATCAATTCGTCTCCGCCGTCAAAACAAGTTGTTCTTGCCAACAAG  
125 L C M P Y P T V D Q F V S A V K Q V V L A N K  
484 AAATGGATTCTCCTCCGGGGAGAGGAACATTGTATATCAGACCAATCTTGTTGGTAGTGGTCTATA  
148 K W I P P P G R G T L Y I R P I L F G S G P I  
553 CTTGGCTCACTTCTGTTCCCGAGTACACCTTACAGTGTTCATGTCCCGTTGGACGTTATCACAAG  
171 L G S L P V P E Y T F T V F A C P V G R Y H K  
622 GATAACACGGGGTTGAACCTGAAAATTGAAGATAAGTTTCGTCTGCTTTTCCAAGTGAACCGGTGGT  
194 D N T G L N L K I E D K F R R A F P S G T G G  
691 GTTAAGAGTATCACAACTATTCTCCTGTTTGATAACATTAGCAGAGGCGAAAGCGCAAGGTTTCTCT  
217 V K S I T N Y S P V W I T L A E A K A Q G F S  
760 GATGTTTTGTTTTGGCTGCTGCAACTGGCAAAAACGTCGAAGAGCTTTTCGCTTCTAACGTTTTTATA  
240 D V L F L A A A T G K N V E E L F A S N V F I  
829 GTCAAAGGAAATGTTGTGTCGACTCCAGAGATTTAGGAACAATATTGCCCGAGTCACACGTAAGT  
263 V K G N V V S T P E I S G T I L P G V T R K S  
898 GTCATCGAATTAACCTCGTATTTCGGCTACAAGGTTGAGGAACGTGTTGTTCCCGTTGAGGATCTTCTC  
286 V I E L T R D F G Y K V E E R V V P V E D L L  
967 GATGCAGAAGAAGTTTTCTGCACTGGAAGTCTGCAATTGTGACAACTATTGCGTCCGTAACCTTCAAG  
309 D A E E V F C T G T A A I V T T I A S V T F K  
1036 GAGAAAAAGACTGAATTCAAAACAGGTGATAAGACATTGGCTGCGAAGCTCTTTGCGACGTTAACGGAT  
332 E K K T E F K T G D K T L A A K L F A T L T D  
1105 ATCCAGATGGGCCGGTTCGAGGATAAGAAGGGTGGATAGTGGAGCTGACTGATGCCACCAAACCGGG  
355 I Q M G R V E D K K G W I V E L T D A T K P G  
1174 TTGAACTTTGAACTTTTGAAGCTGTAACCTGACAAATTATATAAGAAACATCAGAAGATGTCTCT  
378 L K L \*  
1243 CGATCTTTGTGTTTTATCATATTATGTCATGTTTAAAGGGTCTTAAAGGGTTGATGAAATTTATAAATA  
1312 AAATTTAAGGGTTTTTAAGTTTTACCTATCTACTACTCCTTTGGCCCTTTGGATGGAGAAGTGCGAGA  
1381 AAGCGAGAGAGAGG

Figure S1. Cont.

(b)

1 CGGTCATTCTTACCCTTTGGATCTGTCCGCTGACCCGTCCGTACAACAAGTCGTCCTTGCTCATCTCA  
70 TGTGCTCCTCTGTGTCCAAGAAGGCTGAGACTAGTGGTACTGACCTCAAAACCGTTGTGGAACGGTGG  
139 CCAGAGTATATTCCGAACAAGCTCCCCGACAAGAAGTACGTGCGTGTATTTGATACGACGCTCCGTGAC  
208 GCGGAACAATCTCCCGTGCAGCCCTTACTCCACCGCAGAAGATAGAGATTGCCCGGCAGCTCGCTAAA  
277 CTCAGAGTAGACATCATGGAAGTTGGTTTTCCCGTGTATCAGAGGAAGAGTTCGAAACCATCAAAACC  
1 M E V G F P V S S E E E F E T I K T  
346 ATCGCCAAAACCGTGGGAAACGAGGTTGATGAGGAAACAGGTTATATCCCAGTGATATGCGTCATCGCA  
19 I A K T V G N E V D E E T G Y I P V I C V I A  
415 CGAAGCAAAGAAAGAGATATAAAGGCGGCTGGGAGTCAGTGAAGTACGCAAAGAGGCCGAGGATAGTC  
42 R S K E R D I K A A W E S V K Y A K R P R I V  
484 ATATTCACTTCTACTAGTGACATTCACTTGAAATATAAGTTGAAAATGACTAGAGAAGAAGTCGTCGAG  
65 I F T S T S D I H L K Y K L K M T R E E V V E  
553 ATGGTCGCGAGTAGCATTAGGTTTGGCTAAAAGTTTAGGCTTCGAAGACATCGAGTTTGGTTCGCAAGAT  
88 M V A S S I R F A K S L G F E D I E F G C E D  
622 GCGGCAGGTCCGACAAGGATTATATATGCAAGGTTTTGAAGAAGCGATCAAAGCGGTGCAACCACC  
111 G G R S D K D Y I C K V F E E A I K A G A T T  
691 CTGGCCTGCCCGGACACGGTGGGATCAACATGCCGCACGAATACGGGAAACTTGTGAGATACATCAAA  
134 L A C P D T V G I N M P H E Y G K L V R Y I K  
760 GCAAACACTCCTGGAATTGATGATGTTATCTTCAGCGCTCATTGTCACAATGACCTTGGTGTGCTACC  
157 A N T P G I D D V I F S A H C H N D L G V A T  
829 GCCAACACAATCGCGGTATATGTGCGGGAGCAGCACAAGTCAAGTAACAATCAATGGAATAGGTGAA  
180 A N T I A G I C A G A R Q V E V T I N G I G E  
898 AGAAGTGGGAATGCACCGCTGAAGAGGTCGTGATGGCTTTGAAATGTCGAGGAGCATTGTGATGGGT  
203 R S G N A P L E E V V M A L K C R G A F V M G  
967 GGTGTTTACACAAGAATAGACACAGCCAAATTATGGCTACCAGCAAGATGGTTCAGAATATACTGGC  
226 G V Y T R I D T R Q I M A T S K M V Q E Y T G  
1036 TTGTATGTTTCAGCCACATAAACCTATAGTTGGAGCCAACCTGTTTTGTTTCATGAGAGCGGCATTACCAG  
249 L Y V Q P H K P I V G A N C F V H E S G I H Q  
1105 GATGGGATATTGAAAAATCGGAGTACATATGAGATCTTATCACCAGAAGATGTTGGAGTTGAAAAATCT  
272 D G I L K N R S T Y E I L S P E D V G V V K S  
1174 CAAAATTCAGGCATTGTTCTTGAAAGCTTAGTGGACGTATGCGGTTAAAGGTCGTCTGAAAGAGTTG  
295 Q N S G I V L G K L S G R H A V K G R L K E L  
1243 GGATATGGAATCAGTGATGAGAACTGAACGAGGTTTTCTCACGGTTCAGAGATTTAACCAAGCAGAAA  
318 G Y G I S D E K L N E V F S R F R D L T K Q K  
1312 AAGAGAGTCACGGATGATGATCTAAGGGCATTAGTAACGTGTGGTGTGAAATCTTCTCCTCAGAGAAA  
341 K R V T D D D L R A L V T C G D E I F S S E K  
1381 TTAACGGCACTAACGACAACGAAATCAACAGAAACGGCTATGTACCGTCTCCTCAGATTCTCTCTGTG  
364 L N G T N D N E I N R N G Y V P S P Q I S S V  
1450 GTA TGA ATTATGTGACCACGTCTGTTATGTTGTGTATCACTGTAATATCAAGTTTCTTTGAAACTTG  
387 V \*  
1519 TAATGAATAAAACAAGTTTCTTTTCTATAAAAAAAAAAAAAA

Figure S1. Cont.

(c)

```

1      CTCTCTACTCACACACGCAAACATCATGACAATGATGATGAGCCTTACCACATCGTTACCATACCCT
1      M T M M M S L T T S L P Y P
70     TTTCAAATCCTACTAGTCTTTAGCTTATCCATGGCATCAATCACTTTGCTTGGCCGAATACTATCAAGA
15     F Q I L L V F S L S M A S I T L L G R I L S R
139    CCCTCAAACCAAAAACCGGTCTCGTCAGCTTCTCCCGGACCACCAGGATGGCCATCCTAGGCAAT
38     P S K T K N R S R Q L P P G P P G W P I L G N
208    TTACCCGAATAATGATGACTCGTCCTAGGCACAAATATGTCGGCATTGCCATGGAAGGGCAAAAACCG
61     L P E L M M T R P R H K Y V G I A M E G Q K P
277    GATATCGCATGTTTCAACTTCGCCGGAACACACGCCATCATATAAACTCCGACGAGATCGCTCGAGAA
84     D I A C F N F A G T H A I I I N S D E I A R E
346    GCGCTTAAAGAGAGAGACGCCGACTTCGCAGACCGGCCTAATCTTTTCAACATGAGAACCATCGGAGGC
107    A L K E R D A D F A D R P N L F N M R T I G G
415    AATCACAATCAATGGGAACACACCCTACGGTGAACAGTTCATGAAGATGAAAAGAGTGATCAGAACC
130    N H K S M G N T P Y G E Q F M K M K R V I R T
484    GAGATTATGTCCGTAAAACATTAACATGTTAGAAGCTGCGAGAACTATTGAAGCGGACAACCTCCTT
153    E I M S V K T L N M L E A A R T I E A D N L L
553    GCTTACCTTCTCCTCATGTACAAACGGTCTGAGACTGCTGACGCTAGAGAGTTCTCGAGGGTTTATGGT
176    A Y L L S M Y K R S E T A D A R E F S R V Y G
622    TACGCTGTGACCATGAGATTGTTGTTTGAAGGAGACATGTCACGAAAAGAAAATGTTTCTCCGACGAG
199    Y A V T M R L L F G R R H V T K E N V F S D E
691    GGAAGGTTAGGACAAGCGGAGAAAGATCATCTTGATGCGATTTTCGAAACCTTAAACTGTTTCCGAGT
222    G R L G Q A E K D H L D A I F E T L N C L P S
760    TTCTCTCCGGCGATTACTTGAAAAATGGTTTAGAGGTTGGAACATTGATGGTCAAGAGGAGAGGGTG
245    F S P A D Y L E K W F R G W N I D G Q E E R V
829    GTAATGTCTGTAATAAAGTTCGCAGTTACAACAATCCGATCATTGACGAGAGGGTGGAGTTATGGAGG
268    V M S C N K V R S Y N N P I I D E R V E L W R
898    GAAAAAGGTGGTAAAGCATCTGTTGAAGATTGGATTGATACTTTCATTACGCTAAAAGATGAAAATGGA
291    E K G G K A S V E D W I D T F I T L K D E N G
967    AAGTATTATATACCCCGGATGAGGTCAAAGCTCAATCGGTTGAATTTGTATAGCAGCGATCGATAAT
314    K Y Y I T P D E V K A Q C V E F C I A A I D N
1036   CCGGCAAATAACATGGAATGGACACTTCGGGAAATGTTAAAGAACCCGGAGATTCTCAAAAAAGCTTTG
337    P A N N M E W T L A E M L K N P E I L K K A L
1105   AAGGAGTTAGACGAAGTGGTGGGAAGAGACAGGCTTGTTCAGGAATCTGACATACCAAATCTAAACTAT
360    K E L D E V V G R D R L V Q E S D I P N L N Y
1174   TTAAGCTTGTGCAGAGAAACATTACAGATTACCCCTAGTGCTCATTATGTCCCTACACATGTGGCT
383    L K A C C R E T F R I H P S A H Y V P T H V A
1243   CGTCAAGATAACCACCTCGGGGGTTATTTCAATCCCAAAGGTAGCCACATTTCATGATAGGCCGCTCCTGGA
406    R Q D T T L G G Y F I P K G S H I H V G R P G
1312   ATAGCCGGAGCTCAAAAATATGGACAGATCCATTGGTATACAAACCAGAGCGTCACCTAGAAGGAGAT
429    I G R S S K I W T D P L V Y K P E R H L E G D
1381   GGAATATCGAAGGAGCTTTCTCTGGTCGAAACTGAATTGCGTTCGTGTCGTTTGGTACCGGTGGCGT
452    G I S K E L S L V E T E L R F V S F G T G R R
1450   GGCTGCGTGGGTGTTAAAGTCGGGACGATCATGATGGTTATAATGTGGCTAGGTTTCTTCAAGCGTTT
475    G C V G V K V G T I M M V I M L A R F L Q A F
1519   AATTGAAAACCTCATCCTGGTTATGGACCGTTAAGTCTAGAGGAGGATGATGCATTGCTTATGGCTAAG
498    N W K L H P G Y G P L S L E E D D A L L M A K
1588   CCTCTTCTTGTCCGTCGAGCCACGCTTGGCACCCAACCTTTATCCAAAATTTGCCCTTGAGTGAAAA
521    P L L L S V E P R L A P N L Y P K F A L E *
1657   AAAAAACATTAACAGAAAAAGGAAACA

```

**Figure S1.** (a) Sequence analysis of nucleotide and deduced amino acid sequences of *BCAT4*; (b) Sequence analysis of nucleotide and deduced amino acid sequences of *MAMI*; (c) Sequence analysis of nucleotide and deduced amino acid sequences of *CYP79F1*. The start codon is indicated in purple. The stop codon is indicated in yellow. The BCAT beta family domain is indicated in green. The DRE TIM IPMS domain is indicated in blue. The p450 domain is indicated in red.

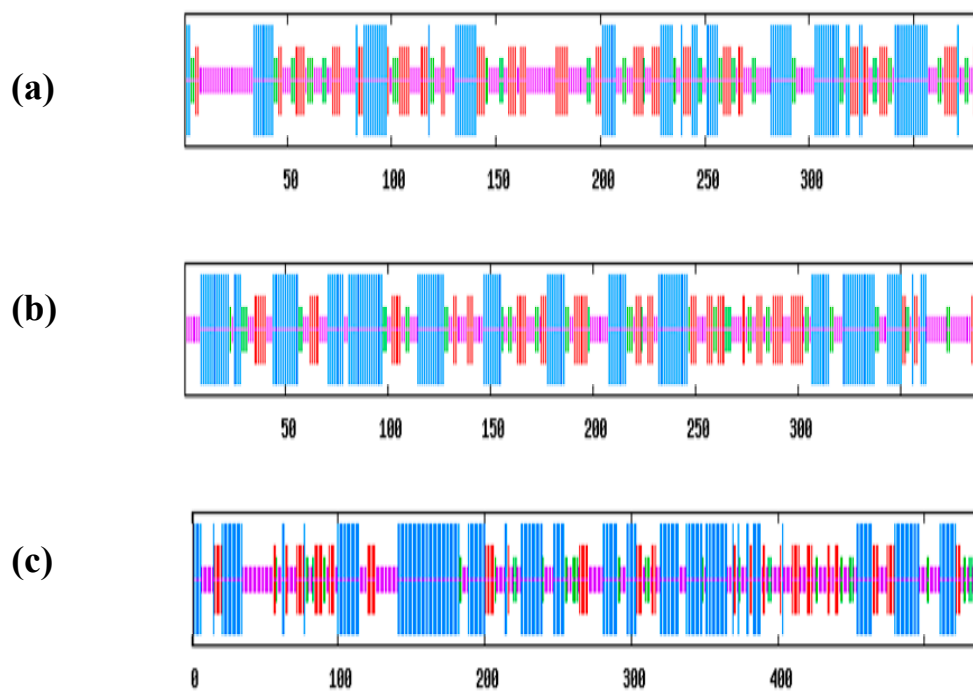

**Figure S2.** (a) The secondary structures of *BCAT4*; (b) The secondary structures of *MAM1*; (c) The secondary structures of *CYP79F1*. The longest vertical bar represents alpha helix. The second longest one represents extended strand. The third longest one represents the random coil. The shortest one represents beta turn.

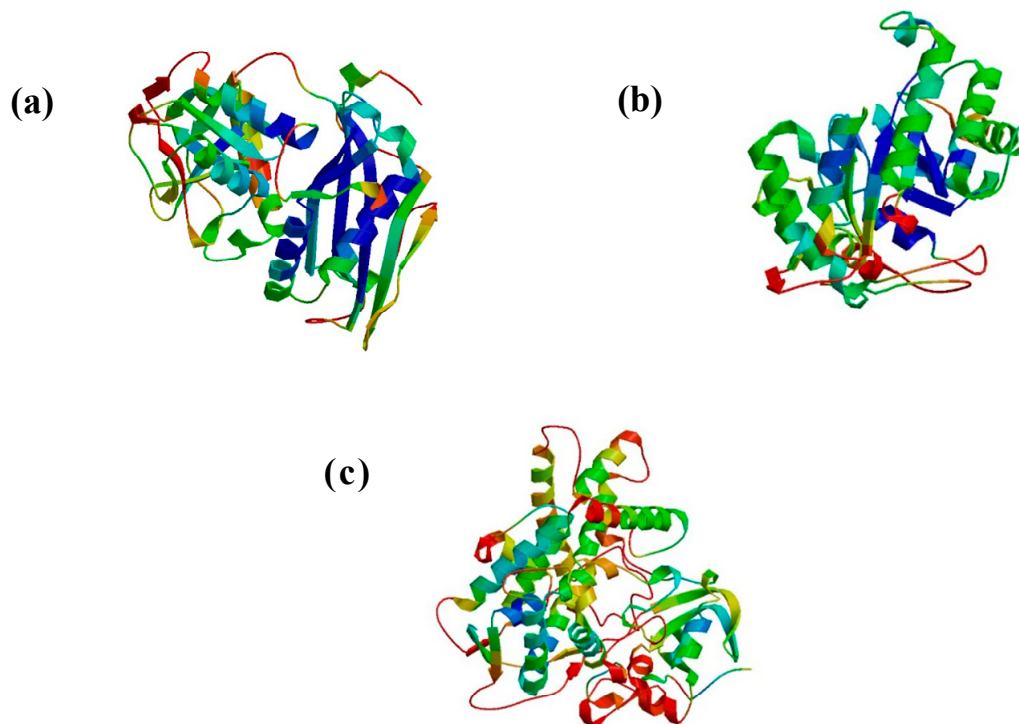

**Figure S3.** (a) Three-dimensional model structures of *BCAT4*; (b) Three-dimensional model structures of *MAM1*; (c) Three-dimensional model structures of *CYP79F1*.

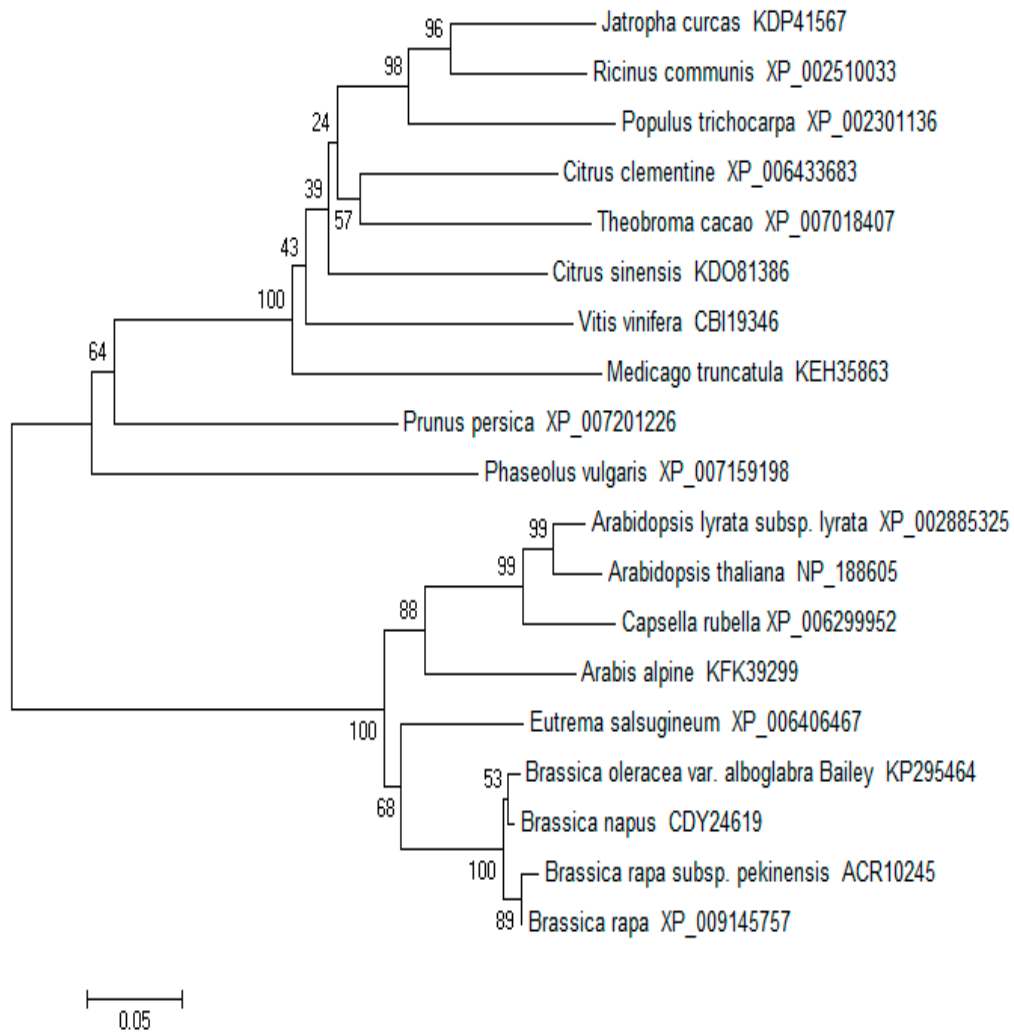

**Figure S4.** The phylogenetic trees of BCAT4 in Chinese kale with other plants. Accession numbers: *Arabis alpine* (KFK39299), *Arabidopsis thaliana* (NP\_188605), *Arabidopsis lyrata* subsp. *lyrata* (XP\_002885325), *Brassica napus* (CDY24619), *Brassica rapa* (XP\_009145757), *Brassica rapa* subsp. *pekinensis* (ACR10245), *Capsella rubella* (XP\_006299952), *Citrus clementine* (XP\_006433683), *Citrus sinensis* (KDO81386), *Eutrema salsugineum* (XP\_006406467), *Jatropha curcas* (KDP41567), *Medicago truncatula* (KEH35863), *Ricinus communis* (XP\_002510033), *Phaseolus vulgaris* (XP\_007159198), *Populus trichocarpa* (XP\_002301136), *Prunus persica* (XP\_007201226), *Theobroma cacao* (XP\_007018407) and *Vitis vinifera* (CBI19346).

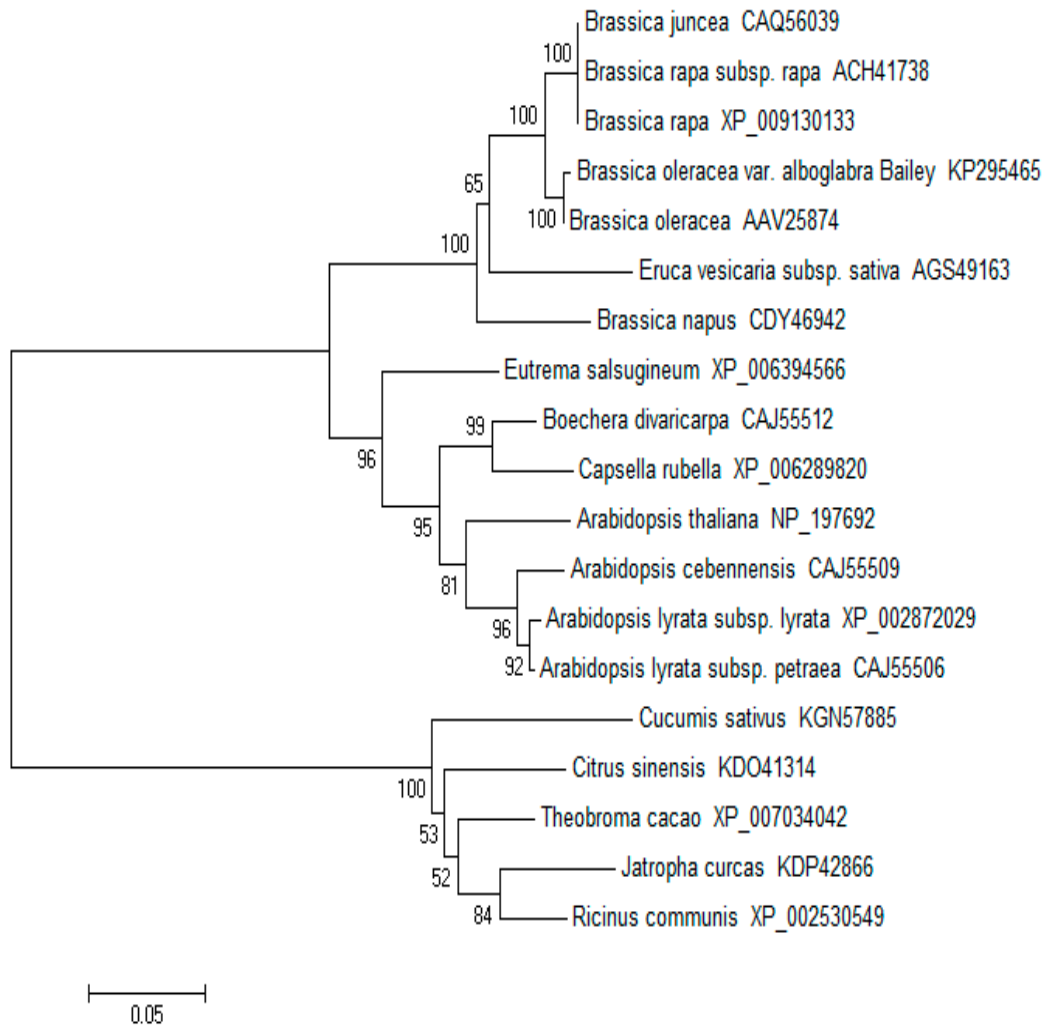

**Figure S5.** The phylogenetic trees of MAM1 in Chinese kale with other plants. Accession numbers: *Arabidopsis thaliana* (NP\_197692), *Arabis alpine* (KFK27840), *Arabidopsis lyrata subsp. lyrata* (XP\_002872029), *Arabidopsis cebennensis* (CAJ55509), *Arabidopsis lyrata subsp. petraea* (CAJ55506), *Brassica oleracea* (AAV25874), *Brassica juncea* (CAQ56039), *Brassica napus* (CDY46942), *Brassica rapa* (XP\_009130133), *Brassica rapa subsp. rapa* (ACH41738), *Boechera divaricarpa* (CAJ55512), *Capsella rubella* (XP\_006289820), *Cucumis sativus* (KGN57885), *Citrus sinensis* (KDO41314), *Eutrema salsugineum* (XP\_006394566), *Eruca vesicaria subsp. sativa* (AGS49163), *Jatropha curcas* (KDP42866), *Ricinus communis* (XP\_002530549) and *Theobroma cacao* (XP\_007034042).

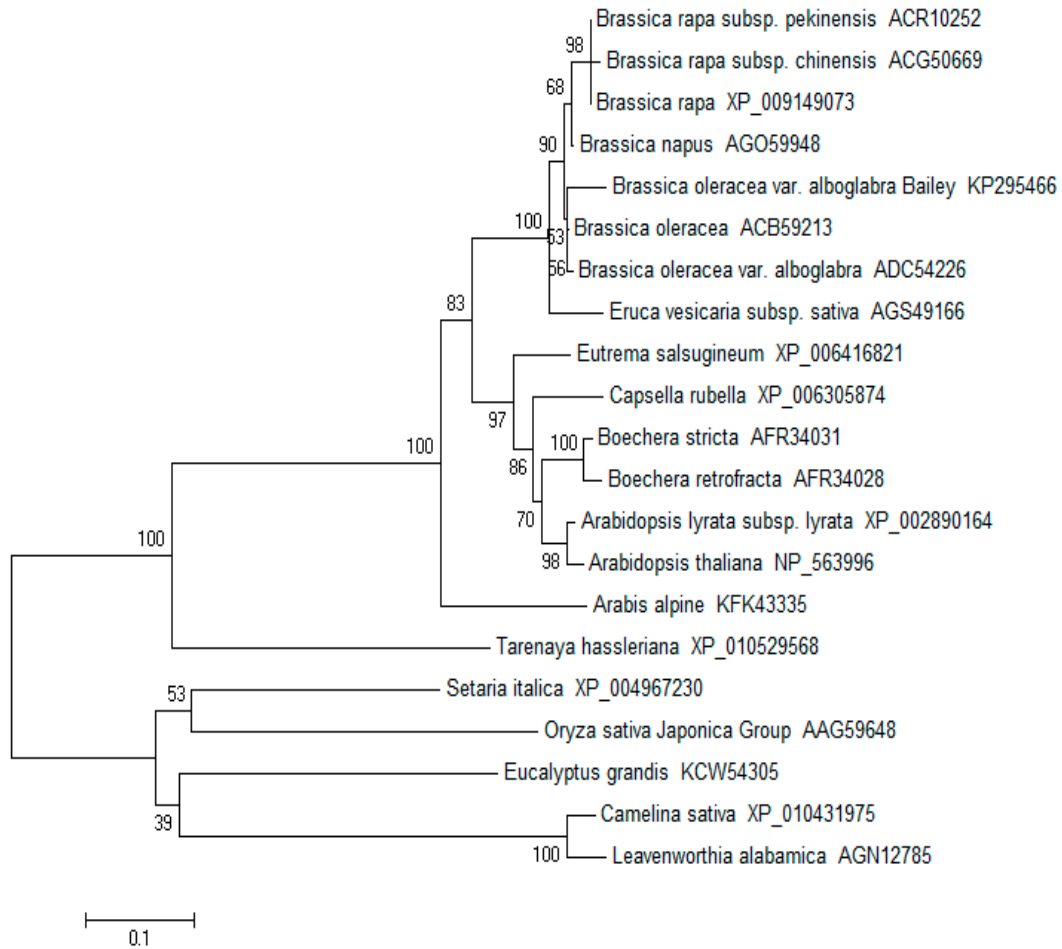

**Figure S6.** The phylogenetic trees of CYP79F1 in Chinese kale with other plants. Accession numbers: *Arabis alpine* (KFK43335), *Arabidopsis thaliana* (NP\_563996), *Arabidopsis lyrata* subsp. *lyrata* (XP\_002890164), *Brassica oleracea* var. *alboglabra* (ADC54226), *Brassica rapa* subsp. *pekinensis* (ACR10252), *Brassica rapa* subsp. *chinensis* (ACG50669), *Brassica napus* (AGO59948), *Boechera retrofracta* (AFR34028), *Brassica oleracea* (ACB59213), *Boechera stricta* (AFR34031), *Camelina sativa* (XP\_010431975), *Capsella rubella* (XP\_006305874), *Eruca vesicaria* subsp. *sativa* (AGS49166), *Eutrema salsugineum* (XP\_006416821), *Eucalyptus grandis* (KCW54305), *Leavenworthia alabamica* (AGN12785), *Setaria italica* (XP\_004967230), *Oryza sativa* Japonica Group (AAG59648) and *Tarenaya hassleriana* (XP\_010529568).
